# Supplementary material for: Six Express Sequence Tag–Simple Sequence Repeat Primers Reveal Genetic Diversity in the Cultivars of Three Zanthoxylum Species
Source: MDPI journal article supplement (doi:10.3390/cimb45090454), 2023-08-30
Supplement: s1 [file s1]

**Supplementary Table S3.** Table of Morphology characteristics of *Z. bungeanum*, *Z. armatum* and *Z. piperitum*.

| Species              | <i>Z.bungeanum</i>                                                                                | <i>Z.armatum</i>                                                                                          | <i>Z.piperitum</i>                                                          |
|----------------------|---------------------------------------------------------------------------------------------------|-----------------------------------------------------------------------------------------------------------|-----------------------------------------------------------------------------|
| Type and height      | Deciduous shrub or tree<br>height 3-7m                                                            | Evergreen shrub or tree<br>height 3-5m                                                                    | Deciduous shrub<br>height 3-5m                                              |
| Prickle distribution | Stem and branch                                                                                   | Stem and branch                                                                                           | Stingless                                                                   |
| Leaf                 | Oppositifolious,5-13 leaflets<br>oval or lanceolate<br>obsolete leaf wing<br>serrated leaf margin | Oppositifolious,3-9 leaflets<br>lanceolate usually<br>apparent leaf wing<br>obsolete serrated leaf margin | Oppositifolious,11-17 leaflets<br>Lanceolate<br>Leaf margins obtuse serrate |
| Flower               | Unisexual flower<br>panicle<br>florescence:March to May                                           | Unisexual flower,panicle<br>florescence:April to May                                                      | Unisexual flower,<br>Cymose panicles terminal<br>florescence:April          |
| Fruit                | Red fruit for mature<br>claret-colored fruit for mature<br>fructescence: August                   | Green fruit for immature<br>Red fruit for mature<br>fructescence: September                               | Red fruit for mature<br>fructescence: September to October                  |
| Flavour              | Apparent aroma and spicy                                                                          | Aromatic and pungent                                                                                      | Intensively aroma                                                           |
