# Supplementary material for: Six Express Sequence Tag–Simple Sequence Repeat Primers Reveal Genetic Diversity in the Cultivars of Three Zanthoxylum Species
Source: MDPI journal article supplement (doi:10.3390/cimb45090454), 2023-08-30
Supplement: s1 [file s1]

**Supplementary Table S1.** Table of 121 *Zanthoxylum* Samples information

| Accession | Sample                                                       | Abbreviation     | Sample origin                                         | Time<br>Day/Month/Year | Altitude<br>(m) | Location            | Remark     | Appraiser |
|-----------|--------------------------------------------------------------|------------------|-------------------------------------------------------|------------------------|-----------------|---------------------|------------|-----------|
| 1         | <i>Z.bungeanum</i><br>'Jiulong Huajiao'                      | ZB-JLHJ          | Sichuan Province                                      | -                      | 2800            | 28°59'N<br>101°30'E | -          | Meng Ye   |
| 2         | <i>Z. bungeanum</i><br>'Yuexi Gongjiao'                      | ZB-YXGJ          | Liangshan Yi<br>Autonomous Prefecture<br>Yuexi County | -                      | -               | -                   | -          | Meng Ye   |
| 3         | <i>Z. bungeanum</i><br>'Honghuajiao'(XD)                     | ZB-HHJ(XD)       | Sichuan Province<br>Xide County                       | -                      | 1600            | -                   | -          | Meng Ye   |
| 4         | <i>Z. bungeanum</i><br>'Honghuajiao'(DB)-1                   | ZB-HHJ(DB)-1     | Sichuan Province Danba<br>County                      | 9/12/2016              | -               | -                   | -          | Meng Ye   |
| 5         | <i>Z. bungeanum</i><br>'Honghuajiao'(DB)-2                   | ZB-HHJ(DB)-2     | Sichuan Province Danba<br>County                      | 9/12/2016              | -               | -                   | -          | Meng Ye   |
| 6         | <i>Z.bungeanum</i><br>'Hanyuan Dahongpao'<br>(Stingless)     | ZB-HYDHP(Sti)    | Sichuan Province<br>Hanyuan County                    | 2015                   | -               | -                   | Stingless  | Meng Ye   |
| 7         | <i>Z. bungeanum</i><br>'Hanyuan<br>Huajiao'(Zhenglu )        | ZB-HYHJ (ZL )    | Sichuan Province<br>Hanyuan County                    | 2015                   | -               | -                   | -          | Meng Ye   |
| 8         | <i>Z.bungeanum</i> 'Maoxian<br>Dahongpao'                    | ZB-MXDHP         | Sichuan Province<br>Maoxian County                    | -                      | -               | -                   | -          | Meng Ye   |
| 9         | <i>Z.bungeanum</i><br>'Hancheng Dahongpao'<br>(Irradiated)-1 | ZB-HCDHP(Irr)--1 | Shanxi Province<br>Hancheng City                      | 17/11/2017             | -               |                     | Irradiated | Meng Ye   |

|    |                                                              |                 |                                  |            |      |                          |            |         |
|----|--------------------------------------------------------------|-----------------|----------------------------------|------------|------|--------------------------|------------|---------|
| 10 | <i>Z.bungeanum</i><br>'Hancheng Dahongpao'<br>(Irradiated)-2 | ZB-HCDHP(Irr)-2 | Shanxi Province<br>Hancheng City | 17/11/2017 | -    |                          | Irradiated | Meng Ye |
| 11 | <i>Z.bungeanum</i><br>'Hancheng<br>Dahongpao'(Irradiated)-3  | ZB-HCDHP(Irr)-3 | Shanxi Province<br>Hancheng City | 17/11/2017 | -    |                          | Irradiated | Meng Ye |
| 12 | <i>Z.bungeanum</i><br>'Dahongpao'(LN)-1                      | ZB-DHP(LN)-1    | Gansu Province<br>Longnan City   | 30/6/2017  | 1314 | 33°27'46"N<br>104°57'62" | -          | Meng Ye |
| 13 | <i>Z.bungeanum</i><br>'Dahongpao'(LN)-2                      | ZB-DHP(LN)-2    | Gansu Province<br>Longnan City   | 30/6/2017  | 1314 | 33°27'46"N<br>104°57'62" | -          | Meng Ye |
| 14 | <i>Z.bungeanum</i><br>'Dahongpao'(LN)-3                      | ZB-DHP(LN)-3    | Gansu Province<br>Longnan City   | 30/6/2017  | 1314 | 33°27'46"N<br>104°57'62" | -          | Meng Ye |
| 15 | <i>Z.bungeanum</i><br>'Hancheng<br>Dahongpao'(LN)-1          | ZB-HCDHP(LN)-1  | Gansu Province<br>Longnan City   | 30/6/2017  | 1314 | 33°27'46"N<br>104°57'62" | -          | Meng Ye |
| 16 | <i>Z.bungeanum</i><br>'Hancheng<br>Dahongpao'(LN)-2          | ZB-HCDHP(LN)-2  | Gansu Province<br>Longnan City   | 30/6/2017  | 1314 | 33°27'46"N<br>104°57'62" | -          | Meng Ye |
| 17 | <i>Z.bungeanum</i><br>'Maowen Dahongpao'-1                   | ZB-MWDHP-1      | Gansu Province<br>Longnan City   | 30/6/2017  | 1314 | 33°27'46"N<br>104°57'62" | -          | Meng Ye |
| 18 | <i>Z.bungeanum</i><br>'Maowen Dahongpao'-2                   | ZB-MWDHP-2      | Gansu Province<br>Longnan City   | 30/6/2017  | 1314 | 33°27'46"N<br>104°57'62" | -          | Meng Ye |
| 19 | <i>Z.bungeanum</i><br>'Maowen Dahongpao'-3                   | ZB-MWDHP-3      | Gansu Province<br>Longnan City   | 30/6/2017  | 1314 | 33°27'46"N<br>104°57'62" | -          | Meng Ye |
| 20 | <i>Z.bungeanum</i><br>'Linzhou Dahongpao'-1                  | ZB-LZDHP-1      | Gansu Province<br>Longnan City   | 30/6/2017  | 1314 | 33°27'46"N<br>104°57'62" | -          | Meng Ye |

|    |                                                     |                 |                                |           |      |                          |           |         |
|----|-----------------------------------------------------|-----------------|--------------------------------|-----------|------|--------------------------|-----------|---------|
| 21 | <i>Z. bungeanum</i><br>'Linzhou Dahongpao'-2        | ZB-LZDHP-2      | Gansu Province<br>Longnan City | 30/6/2017 | 1314 | 33°27'46"N<br>104°57'62" | -         | Meng Ye |
| 22 | <i>Z. bungeanum</i><br>'Laiwu Xiaohongjiao'-1       | ZB-LWXHJ-1      | Gansu Province<br>Longnan City | 9/12/2016 | 1314 | 33°27'46"N<br>104°57'62" | -         | Meng Ye |
| 23 | <i>Z. bungeanum</i><br>'Laiwu Xiaohongjiao'-2       | ZB-LWXHJ-2      | Gansu Province<br>Longnan City | 9/12/2016 | 1314 | 33°27'46"N<br>104°57'62" | -         | Meng Ye |
| 24 | <i>Z. bungeanum</i><br>'Laiwu Xiaohongjiao'-3       | ZB-LWXHJ-3      | Gansu Province<br>Longnan City | 9/4/2017  | 1314 | 33°27'46"N<br>104°57'62" | -         | Meng Ye |
| 25 | <i>Z. bungeanum</i><br>'Laiwu Huajiao'(stingless)-1 | ZB-LWHJ(STI)-1  | Gansu Province<br>Longnan City | 9/4/2017  | 1316 | 33°27'46"N<br>104°57'63" | stingless | Meng Ye |
| 26 | <i>Z. bungeanum</i><br>'Laiwu Huajiao'(stingless)-2 | ZB-LWHJ(STI)--2 | Gansu Province<br>Longnan City | 9/4/2017  | 1316 | 33°27'46"N<br>104°57'63" | stingless | Meng Ye |
| 27 | <i>Z. bungeanum</i><br>'Laiwu Huajiao'(stingless)-3 | ZB-LWHJ(STI)--3 | Gansu Province<br>Longnan City | 9/4/2017  | 1316 | 33°27'46"N<br>104°57'63" | stingless | Meng Ye |
| 28 | <i>Z. bungeanum</i><br>'Laiwu Dahongpao'-1          | ZB-LWDHP-1      | Gansu Province<br>Longnan City | 14/5/2017 | 1316 | 33°27'46"N<br>104°57'63" | -         | Meng Ye |
| 29 | <i>Z. bungeanum</i><br>'Laiwu Dahongpao'-2          | ZB-LWDHP-2      | Gansu Province<br>Longnan City | 14/5/2017 | 1316 | 33°27'46"N<br>104°57'63" | -         | Meng Ye |
| 30 | <i>Z. bungeanum</i><br>'Laiwu Dahongpao'-3          | ZB-LWDHP-3      | Gansu Province<br>Longnan City | 29/6/2017 | 1316 | 33°27'46"N<br>104°57'63" | -         | Meng Ye |
| 31 | <i>Z. bungeanum</i><br>'Erhongpao'-1                | ZB-ErHP-1       | Gansu Province<br>Longnan City | 30/6/2017 | 1316 | 33°27'46"N<br>104°57'63" | -         | Meng Ye |
| 32 | <i>Z. bungeanum</i><br>'Erhongpao'-2                | ZB-ErHP-2       | Gansu Province<br>Longnan City | 30/6/2017 | 1316 | 33°27'46"N<br>104°57'63" | -         | Meng Ye |

|    |                                       |             |                                |           |      |                          |   |         |
|----|---------------------------------------|-------------|--------------------------------|-----------|------|--------------------------|---|---------|
| 33 | <i>Z.bungeanum</i><br>'Erhongpao'-3   | ZB-ErHP-3   | Gansu Province<br>Longnan City | 30/6/2017 | 1316 | 33°27'46"N<br>104°57'63" | - | Meng Ye |
| 34 | <i>Z.bungeanum</i><br>'Youjiao'-1     | ZB-YJ-1     | Gansu Province<br>Longnan City | 30/6/2017 | 1316 | 33°27'46"N<br>104°57'63" | - | Meng Ye |
| 35 | <i>Z.bungeanum</i><br>'Youjiao'-2     | ZB-YJ-2     | Gansu Province<br>Longnan City | 30/6/2017 | 1316 | 33°27'46"N<br>104°57'63" | - | Meng Ye |
| 36 | <i>Z.bungeanum</i><br>'Youjiao'-3     | ZB-YJ-3     | Gansu Province<br>Longnan City | 30/6/2017 | 1316 | 33°27'46"N<br>104°57'63" | - | Meng Ye |
| 37 | <i>Z.bungeanum</i><br>'Meihuaajiao'-1 | ZB-MHJ-1    | Gansu Province<br>Longnan City | 30/6/2017 | 1316 | 33°27'46"N<br>104°57'63" | - | Meng Ye |
| 38 | <i>Z.bungeanum</i><br>'Meihuaajiao'-2 | ZB-MHJ-2    | Gansu Province<br>Longnan City | 30/6/2017 | 1316 | 33°27'46"N<br>104°57'63" | - | Meng Ye |
| 39 | <i>Z.bungeanum</i><br>'Meihuaajiao'-3 | ZB-MHJ-3    | Gansu Province<br>Longnan City | 30/6/2017 | 1316 | 33°27'46"N<br>104°57'63" | - | Meng Ye |
| 40 | <i>Z.bungeanum</i><br>'Wuxuan NO.1'-1 | ZB-WXNO.1-1 | Gansu Province<br>Longnan City | 30/6/2017 | 1316 | 33°27'46"N<br>104°57'63" | - | Meng Ye |
| 41 | <i>Z.bungeanum</i><br>'Wuxuan NO.1'-2 | ZB-WXNO.1-2 | Gansu Province<br>Longnan City | 30/6/2017 | 1316 | 33°27'46"N<br>104°57'63" | - | Meng Ye |
| 42 | <i>Z.bungeanum</i><br>'Wuxuan NO.1'-3 | ZB-WXNO.1-3 | Gansu Province<br>Longnan City | 30/6/2017 | 1316 | 33°27'46"N<br>104°57'63" | - | Meng Ye |
| 43 | <i>Z.bungeanum</i><br>'Wuxuan NO.2'-1 | ZB-WXNO.2-1 | Gansu Province<br>Longnan City | 30/6/2017 | 1316 | 33°27'46"N<br>104°57'63" | - | Meng Ye |
| 44 | <i>Z.bungeanum</i><br>'Wuxuan NO.2'-2 | ZB-WXNO.2-2 | Gansu Province<br>Longnan City | 30/6/2017 | 1316 | 33°27'46"N<br>104°57'63" | - | Meng Ye |

|    |                                                            |                    |                                |           |      |                          |           |         |
|----|------------------------------------------------------------|--------------------|--------------------------------|-----------|------|--------------------------|-----------|---------|
| 45 | <i>Z. bungeanum</i><br>'Wuxuan NO.2'-3                     | ZB-WXNO.2-3        | Gansu Province<br>Longnan City | 30/6/2017 | 1316 | 33°27'46"N<br>104°57'63" | -         | Meng Ye |
| 46 | <i>Z. bungeanum</i><br>'Wuxuan NO.3'-1                     | ZB-WXNO.3-1        | Gansu Province<br>Longnan City | 30/6/2017 | 1316 | 33°27'46"N<br>104°57'63" | -         | Meng Ye |
| 47 | <i>Z. bungeanum</i><br>'Wuxuan NO.3'-2                     | ZB-WXNO.3-2        | Gansu Province<br>Longnan City | 30/6/2017 | 1316 | 33°27'46"N<br>104°57'63" | -         | Meng Ye |
| 48 | <i>Z. bungeanum</i><br>'Qin An NO.1'-1                     | ZB-QANO.1-1        | Gansu Province<br>Longnan City | 30/6/2017 | 1316 | 33°27'46"N<br>104°57'63" | -         | Meng Ye |
| 49 | <i>Z. bungeanum</i><br>'Qin An NO.1'-2                     | ZB-QANO.1-2        | Gansu Province<br>Longnan City | 30/6/2017 | 1316 | 33°27'46"N<br>104°57'63" | -         | Meng Ye |
| 50 | <i>Z. bungeanum</i><br>'Qin An NO.1'-3                     | ZB-QANO.1-3        | Gansu Province<br>Longnan City | 30/6/2017 | 1316 | 33°27'46"N<br>104°57'63" | -         | Meng Ye |
| 51 | <i>Z. bungeanum</i><br>'Heibei Wuci No.2'<br>(stingless)-1 | ZB-HBWCNO.2(Sti)-1 | Gansu Province<br>Longnan City | 30/6/2017 | 1316 | 33°27'46"N<br>104°57'63" | stingless | Meng Ye |
| 52 | <i>Z. bungeanum</i><br>'Heibei Wuci No.2'<br>(stingless)-2 | ZB-HBWCNO.2(Sti)-2 | Gansu Province<br>Longnan City | 30/6/2017 | 1316 | 33°27'46"N<br>104°57'63" | stingless | Meng Ye |
| 53 | <i>Z. bungeanum</i><br>'Fengjiao'-1                        | ZB-FJ-1            | Gansu Province<br>Longnan City | 30/6/2017 | 1316 | 33°27'46"N<br>104°57'63" | -         | Meng Ye |

|    |                                      |          |                                |           |      |                          |   |         |
|----|--------------------------------------|----------|--------------------------------|-----------|------|--------------------------|---|---------|
| 54 | <i>Z.bungeanum</i><br>'Fengjiao'-2   | ZB-FJ-2  | Gansu Province<br>Longnan City | 30/6/2017 | 1316 | 33°27'46"N<br>104°57'63" | - | Meng Ye |
| 55 | <i>Z.bungeanum</i><br>'Fengjiao'-3   | ZB-FJ-3  | Gansu Province<br>Longnan City | 30/6/2017 | 1316 | 33°27'46"N<br>104°57'63" | - | Meng Ye |
| 56 | <i>Z.bungeanum</i><br>'Baishajiao'-1 | ZB-BSJ-1 | Gansu Province<br>Longnan City | 30/6/2017 | 1316 | 33°27'46"N<br>104°57'63" | - | Meng Ye |
| 57 | <i>Z.bungeanum</i><br>'Baishajiao'-2 | ZB-BSJ-2 | Gansu Province<br>Longnan City | 30/6/2017 | 1316 | 33°27'46"N<br>104°57'63" | - | Meng Ye |
| 58 | <i>Z.bungeanum</i><br>'Mianjiao'-1   | ZB-MJ-1  | Gansu Province<br>Longnan City | 30/6/2017 | 1316 | 33°27'46"N<br>104°57'63" | - | Meng Ye |
| 59 | <i>Z.bungeanum</i><br>'Mianjiao'-2   | ZB-MJ-2  | Gansu Province<br>Longnan City | 30/6/2017 | 1316 | 33°27'46"N<br>104°57'63" | - | Meng Ye |
| 60 | <i>Z.bungeanum</i><br>'Mianjiao'-3   | ZB-MJ-3  | Gansu Province<br>Longnan City | 30/6/2017 | 1316 | 33°27'46"N<br>104°57'63" | - | Meng Ye |
| 61 | <i>Z.bungeanum</i><br>'Doujiao'-1    | ZB-DJ-1  | Gansu Province<br>Longnan City | 30/6/2017 | 1316 | 33°27'46"N<br>104°57'63" | - | Meng Ye |
| 62 | <i>Z.bungeanum</i><br>'Doujiao'-2    | ZB-DJ-2  | Gansu Province<br>Longnan City | 30/6/2017 | 1316 | 33°27'46"N<br>104°57'63" | - | Meng Ye |
| 63 | <i>Z.bungeanum</i><br>'Doujiao'-3    | ZB-DJ-3  | Gansu Province<br>Longnan City | 30/6/2017 | 1316 | 33°27'46"N<br>104°57'63" | - | Meng Ye |
| 64 | <i>Z.bungeanum</i><br>'Bayuejiao'-1  | ZB-BYJ-1 | Gansu Province<br>Longnan City | 30/6/2017 | 1316 | 33°27'46"N<br>104°57'63" | - | Meng Ye |

|    |                                              |               |                                    |           |      |                          |                     |         |
|----|----------------------------------------------|---------------|------------------------------------|-----------|------|--------------------------|---------------------|---------|
| 65 | <i>Z. bungeanum</i><br>'Bayuejiao'-2         | ZB-BYJ-2      | Gansu Province<br>Longnan City     | 30/6/2017 | 1316 | 33°27'46"N<br>104°57'63" | -                   | Meng Ye |
| 66 | <i>Z. bungeanum</i><br>'Bayuejiao'-3         | ZB-BYJ-3      | Gansu Province<br>Longnan City     | 30/6/2017 | 1316 | 33°27'46"N<br>104°57'63" | -                   | Meng Ye |
| 67 | <i>Z. bungeanum</i><br>'X'(Male flower only) | ZB-X(MF)      | Gansu Province<br>Longnan City     | 30/6/2017 | 1316 | 33°27'46"N<br>104°57'63" | Male flower<br>only | Meng Ye |
| 68 | <i>Z. armatum</i><br>'Jiuye Qinghuajiao'-1   | ZA-JyQHJ-1    | Sichuan Province<br>Santai County  | 8/12/2016 | 450  | 31°19'N<br>104°50'E      | -                   | Meng Ye |
| 69 | <i>Z. armatum</i><br>'Jiuye Qinghuajiao'-2   | ZA-JyQHJ-2    | Sichuan Province<br>Santai County  | 8/12/2016 | 450  | 31°19'N<br>104°50'E      | -                   | Meng Ye |
| 70 | <i>Z. armatum</i><br>'Jiuye Qinghuajiao'-3   | ZA-JyQHJ-3    | Sichuan Province<br>Santai County  | 8/12/2016 | 450  | 31°19'N<br>104°50'E      | -                   | Meng Ye |
| 71 | <i>Z. armatum</i><br>'Jiuye Qinghuajiao'-4   | ZA-JyQHJ-4    | Sichuan Province<br>Santai County  | 8/12/2016 | 450  | 31°19'N<br>104°50'E      | -                   | Meng Ye |
| 72 | <i>Z. armatum</i><br>'Jiuye Qinghuajiao'-5   | ZA-JyQHJ-5    | Sichuan Province<br>Santai County  | 8/12/2016 | 450  | 31°19'N<br>104°50'E      | -                   | Meng Ye |
| 73 | <i>Z. armatum</i><br>'Danlingtengjiao'(ST)-1 | ZA-DLTJ(ST)-1 | Sichuan Province<br>Santai County  | 8/12/2016 | 450  | 31°19'N<br>104°50'E      | -                   | Meng Ye |
| 74 | <i>Z. armatum</i><br>'Danlingtengjiao'(ST)-2 | ZA-DLTJ(ST)-2 | Sichuan Province<br>Santai County  | 8/12/2016 | 450  | 31°19'N<br>104°50'E      | -                   | Meng Ye |
| 75 | <i>Z. armatum</i><br>'Danlingtengjiao'(ST)-3 | ZA-DLTJ(ST)-3 | Sichuan Province<br>San Tai County | 8/12/2016 | 450  | 31°19'N<br>104°50'E      | -                   | Meng Ye |
| 76 | <i>Z. armatum</i><br>'Erwai Huajiao'-1       | ZA-ErWHJ-1    | Sichuan Province<br>Santai County  | 8/12/2016 | 450  | 31°19'N<br>104°50'E      | -                   | Meng Ye |

|    |                                            |             |                                    |           |     |                           |      |         |
|----|--------------------------------------------|-------------|------------------------------------|-----------|-----|---------------------------|------|---------|
| 77 | <i>Z. armatum</i><br>'Erwai Huajiao'-2     | ZA-ErWHJ-2  | Sichuan Province<br>Santai County  | 8/12/2016 | 450 | 31°19'N<br>104°50'E       | -    | Meng Ye |
| 78 | <i>Z. armatum</i><br>'Erwai Huajiao'-3     | ZA-ErWHJ-3  | Sichuan Province<br>Santai County  | 8/12/2016 | 450 | 31°19'N<br>104°50'E       | -    | Meng Ye |
| 79 | <i>Z. armatum</i><br>(Wild, ST)-1          | ZA-W(ST)-1  | Sichuan Province<br>Santai County  | 8/12/2016 | 450 | 31°19'N<br>104°50'E       | wild | Meng Ye |
| 80 | <i>Z. armatum</i><br>(Wild, ST)-2          | ZA-W(ST)-2  | Sichuan Province<br>Santai County  | 8/12/2016 | 450 | 31°19'N<br>104°50'E       | wild | Meng Ye |
| 81 | <i>Z. armatum</i><br>(Wild, ST)-3          | ZA-W(ST)-3  | Sichuan Province<br>Santai County  | 8/12/2016 | 450 | 31°19'N<br>104°50'E       | wild | Meng Ye |
| 82 | <i>Z. armatum</i><br>(Wild, YA)-1          | ZA-W(YA)-1  | Sichuan Province<br>Ya'an City     | 8/12/2016 | 450 | 29°58'N<br>102°59'E       | wild | Meng Ye |
| 83 | <i>Z. armatum</i><br>(Wild, YA)-2          | ZA-W(YA)-2  | Sichuan Province<br>Ya'an City     | 8/12/2016 | 450 | 29°58'N<br>102°59'E       | wild | Meng Ye |
| 84 | <i>Z. armatum</i><br>(Wild, YA)-3          | ZA-W(YA)-3  | Sichuan Province<br>Ya'an City     | 8/12/2016 | 450 | 29°58'N<br>102°59'E       | wild | Meng Ye |
| 85 | <i>Z. armatum</i><br>'Hanyuan Qinghuajiao' | ZA-HYQHJ    | Sichuan Province<br>Hanyuan County | 2015      | -   | -                         | -    | Meng Ye |
| 86 | <i>Z. armatum</i><br>'Tengjiao'(HY)-1      | ZA-TJ(HY)-1 | Sichuan Province<br>Hongya County  | 8/12/2016 | 450 | 29°53'N<br>103°21'21"E    | -    | Meng Ye |
| 87 | <i>Z. armatum</i><br>'Tengjiao'(HY)-2      | ZA-TJ(HY)-2 | Sichuan Province<br>Hongya County  | 8/12/2016 | 450 | 29°53'51"N<br>103°21'21"E | -    | Meng Ye |
| 88 | <i>Z. armatum</i><br>'Tengjiao'(HY)-3      | ZA-TJ(HY)-3 | Sichuan Province<br>Hongya County  | 8/12/2016 | 450 | 29°53'51"N<br>103°21'21"E | -    | Meng Ye |



|    |                                                       |                 |                                   |           |     |                           |           |         |
|----|-------------------------------------------------------|-----------------|-----------------------------------|-----------|-----|---------------------------|-----------|---------|
| 89 | <i>Z. armatum</i><br>'Tengjiao'(EM)-1                 | ZA-TJ(EM)-1     | Sichuan Province<br>Emeishan City | 8/12/2016 | 450 | 29°30'50"N<br>103°27'12"E | -         | Meng Ye |
| 90 | <i>Z. armatum</i><br>'Tengjiao'(EM)-2                 | ZA-TJ(EM)-2     | Sichuan Province<br>Emeishan City | 8/12/2016 | 475 | 29°30'50"N<br>103°27'12"E | -         | Meng Ye |
| 91 | <i>Z. armatum</i><br>'Tengjiao'(EM)-3                 | ZA-TJ(EM)-3     | Sichuan Province<br>Emeishan City | 9/12/2016 | 475 | 29°30'50"N<br>103°27'12"E | -         | Meng Ye |
| 92 | <i>Z. armatum</i><br>'Tengjiao'(EM)-4                 | ZA-TJ(EM)-4     | Sichuan Province<br>Emeishan City | 9/12/2016 | 475 | 29°30'55"N<br>103°28'09"E | -         | Meng Ye |
| 93 | <i>Z. armatum</i><br>'Tengjiao'(EM)-5                 | ZA-TJ(EM)-5     | Sichuan Province<br>Emeishan City | 9/12/2016 | 475 | 29°30'55"N<br>103°28'09"E | -         | Meng Ye |
| 94 | <i>Z. armatum</i><br>'Tengjiao'(EM)-6                 | ZA-TJ(EM)-6     | Sichuan Province<br>Emeishan City | 9/12/2016 | 453 | 29°30'55"N<br>103°28'09"E | -         | Meng Ye |
| 95 | <i>Z. armatum</i><br>'Tengjiao'(EM)-7                 | ZA-TJ(EM)-7     | Sichuan Province<br>Emeishan City | 9/12/2016 | 453 | 29°30'55"N<br>103°28'19"E | -         | Meng Ye |
| 96 | <i>Z. armatum</i><br>'Tengjiao'(EM)-8                 | ZA-TJ(EM)-8     | Sichuan Province<br>Emeishan City | 9/12/2016 | 453 | 29°30'55"N<br>103°28'19"E | -         | Meng Ye |
| 97 | <i>Z. armatum</i><br>'Tengjiao'(EM)-9                 | ZA-TJ(EM)-9     | Sichuan Province<br>Emeishan City | 9/12/2016 | 475 | 29°30'55"N<br>103°28'19"E | -         | Meng Ye |
| 98 | <i>Z. armatum</i> -1<br>'Tengjiao'<br>(Stingless, DL) | ZA-TJ(Sti,DL)-1 | Sichuan Province<br>Danling City  | 9/12/2016 | 475 | 29°59'26"N<br>103°24'57"E | stingless | Meng Ye |
| 99 | <i>Z. armatum</i><br>'Tengjiao'<br>(Stingless, DL)-2  | ZA-TJ(Sti,DL)-2 | Sichuan Province<br>Danling City  | 9/12/2016 | 475 | 29°59'26"N<br>103°24'57"E | stingless | Meng Ye |

|     |                                                    |                 |                                    |           |      |                           |           |         |
|-----|----------------------------------------------------|-----------------|------------------------------------|-----------|------|---------------------------|-----------|---------|
| 100 | <i>Z. armatum</i><br>'Tengjiao'(Stingless, DL)-3   | ZA-TJ(Sti,DL)-3 | Sichuan Province<br>Danling City   | 9/12/2016 | 475  | 29°59'26"N<br>103°24'57"E | stingless | Meng Ye |
| 101 | <i>Z. armatum</i><br>'Tengjiao'(DL)-1              | ZA-TJ(DL)-1     | Sichuan Province<br>Danling City   | 9/12/2016 | 475  | 29°59'26"N<br>103°24'57"E | -         | Meng Ye |
| 102 | <i>Z. armatum</i><br>'Tengjiao'(DL)-2              | ZA-TJ(DL)-2     | Sichuan Province<br>Danling City   | 9/12/2016 | 475  | 29°59'26"N<br>103°24'57"E | -         | Meng Ye |
| 103 | <i>Z. armatum</i><br>'Tengjiao'(DL)-3              | ZA-TJ(DL)-3     | Sichuan Province<br>Danling City   | 9/12/2016 | 467  | 29°59'26"N<br>103°24'57"E | -         | Meng Ye |
| 104 | <i>Z. armatum</i><br>'Tengjiao'(DL)-GS             | ZA-TJ(DL)-GS    | Sichuan Province<br>Danling County | -         | 1371 | -                         | -         | Meng Ye |
| 105 | <i>Z. armatum</i><br>'Jinyang Qinghuajiao'(DX)     | ZA-JYQHJ(DX)    | Sichuan Province<br>Jinyang County | -         | -    | -                         | -         | Meng Ye |
| 106 | <i>Z. armatum</i><br>'Jinyang Qinghuajiao'<br>(TP) | ZA-JYQHJ(TP)    | Sichuan Province Jinyang<br>County | -         | 1500 | 27°39'N<br>103°15'E       | -         | Meng Ye |
| 107 | <i>Z. armatum</i><br>'Jinyang Qinghuajiao'(MY)     | ZA-JYQHJ(MY)    | Sichuan Province Jinyang<br>County | -         | -    | -                         | -         | Meng Ye |
| 108 | <i>Z. armatum</i><br>'Jinyang Qinghuajiao'-1       | ZA-JYQHJ-1      | Sichuan Province<br>Jinyang City   | 9/12/2016 | 467  | 27°34'N<br>103°9'E        | -         | Meng Ye |
| 109 | <i>Z. armatum</i><br>'Jinyang Qinghuajiao'-2       | ZA-JYQHJ-2      | Sichuan Province<br>Jinyang City   | 9/12/2016 | 467  | 27°28'N<br>103°3'E        | -         | Meng Ye |
| 110 | <i>Z. armatum</i><br>'Jinyang Qinghuajiao'-3       | ZA-JYQHJ-3      | Sichuan Province<br>Jinyang City   | 9/12/2016 | 472  | 27°26'N<br>103°7'E        | -         | Meng Ye |

|     |                                                |              |                                    |           |      |                           |   |         |
|-----|------------------------------------------------|--------------|------------------------------------|-----------|------|---------------------------|---|---------|
| 111 | <i>Z. armatum</i><br>'Jinyang Qinghuajiao'-4   | ZA-JYQHJ-4   | Sichuan Province<br>Jinyang City   | 9/12/2016 | 472  | 27°33'N<br>103°11'E       | - | Meng Ye |
| 112 | <i>Z. armatum</i> 'Qinghuajiao'                | ZA-QHJ       | Sichuan Province<br>Dechang County | 1/12/2016 | -    | -                         | - | Meng Ye |
| 113 | <i>Z. armatum</i><br>'Jinyang Qinghuajiao'(XD) | ZA-JYQHJ(XD) | Sichuan Province<br>Xide County    | -         | 1600 | -                         | - | Meng Ye |
| 114 | <i>Z. armatum</i><br>'Zhaotong Qinghuajiao'    | ZA-ZTQHJ     | Yunnan Province<br>Zhaotong City   | 2015      | -    | -                         | - | Meng Ye |
| 115 | <i>Z. piperitum</i><br>'Chaocang Shanjiao'-1   | ZP-CCSJ-1    | Gansu Province<br>Longnan City     | 30/6/2017 | 1354 | 33°27'46"N<br>104°57'102" | - | Meng Ye |
| 116 | <i>Z. piperitum</i><br>'Chaocang Shanjiao'-2   | ZP-CCSJ-2    | Gansu Province<br>Longnan City     | 30/6/2017 | 1355 | 33°27'46"N<br>104°57'102" | - | Meng Ye |
| 117 | <i>Z. piperitum</i><br>'Chaocang Shanjiao'-3   | ZP-CCSJ-3    | Gansu Province<br>Longnan City     | 30/6/2017 | 1356 | 33°27'46"N<br>104°57'102" | - | Meng Ye |
| 118 | <i>Z. piperitum</i><br>'Liujin Shanjiao'-1     | ZP-LJSJ-1    | Gansu Province<br>Longnan City     | 30/6/2017 | 1368 | 33°27'46"N<br>104°57'116" | - | Meng Ye |
| 119 | <i>Z. piperitum</i><br>'Liujin Shanjiao'-2     | ZP-LJSJ-2    | Gansu Province<br>Longnan City     | 30/6/2017 | 1369 | 33°27'46"N<br>104°57'116" | - | Meng Ye |
| 120 | <i>Z. piperitum</i><br>'Liujin Shanjiao'-3     | ZP-LJSJ-3    | Gansu Province<br>Longnan City     | 30/6/2017 | 1370 | 33°27'46"N<br>104°57'116" | - | Meng Ye |
| 121 | <i>Z. piperitum</i><br>'Putao Shanjiao'        | ZP-PTSJ      | Gansu Province<br>Longnan City     | 30/6/2017 | 1364 | 33°27'46"N<br>104°57'112" | - | Meng Ye |
