# Supplementary material for: Six Express Sequence Tag–Simple Sequence Repeat Primers Reveal Genetic Diversity in the Cultivars of Three Zanthoxylum Species
Source: MDPI journal article supplement (doi:10.3390/cimb45090454), 2023-08-30
Supplement: s1 [file s1]

**Supplementary Table S2.** Table information of six pairs of EST-SSR primers and polymorphsim results

| Accession | SSR sequence                          | Sequence of primer(5'-3')                        | Observed<br>number of<br>alleles<br>( <i>Na</i> ) | Effective<br>number of<br>alleles<br>( <i>Ne</i> ) | Nei's gene<br>diversity<br>( <i>H</i> ) | Shannon's<br>Information<br>index<br>( <i>I</i> ) | polymorphic<br>Loci |
|-----------|---------------------------------------|--------------------------------------------------|---------------------------------------------------|----------------------------------------------------|-----------------------------------------|---------------------------------------------------|---------------------|
| ZB23      | (CCAC) <sub>5</sub> (CA) <sub>8</sub> | F:GGAGCTTCAGACTTGGTGCA<br>R:ACCAGGATCAGGTTCCACGA | 2                                                 | 1.1559                                             | 0.1086                                  | 0.1866                                            | 13                  |
| ZB26      | (AGG) <sub>5</sub>                    | F:ATTCACATCCACTGCGAGCA<br>R:GCCTTGCTGCTCTCCTTACA | 2                                                 | 1.3371                                             | 0.2164                                  | 0.3443                                            | 7                   |
| ZB28      | (CTT) <sub>8</sub>                    | F:TGATAGCCACAGCCACAGTG<br>R:ACAGTGTGTGCCATCCTCAG | 2                                                 | 1.1969                                             | 0.1498                                  | 0.2612                                            | 5                   |
| ZB53      | (GCAACA) <sub>7</sub>                 | F:GCACGGCAACAGTTCGTATC<br>R:CCTGCCCCATTGAATTCCT  | 2                                                 | 1.5337                                             | 0.3205                                  | 0.4884                                            | 6                   |
| ZA26      | (GGA) <sub>5</sub> (GGT) <sub>5</sub> | F:GCAGAACGATGAAGGGTGGA<br>R:TGAACCACAAACCACCACCA | 2                                                 | 1.2738                                             | 0.1608                                  | 0.2543                                            | 13                  |
| ZA51      | (TCCAAG) <sub>5</sub>                 | F:GGTGCCATGTCACAGGATCA<br>R:GTTTGTGACTGCTGCAAGGG | 2                                                 | 1.4961                                             | 0.2855                                  | 0.4287                                            | 7                   |
